# Supplementary material
Source: PubMed Central journal article supplement (PMC4762511)

## **Supporting Information:**

### **Supplemental Figures:**

**Supplemental Figure S1.** Different expressed proteins in Wengfeng07 and Union85140 identified by 2-D MS/MS under salinity stress (at time points T0 and T4). SDS-PAGE gels were stained with Coomassie Brilliant Blue; A and B, 2-D maps of root proteome of Wengfeng07 at time points T0 and T4, respectively; C and D, 2-D maps of root proteome of Union85140 at time points T0 and T4, respectively. This is a biological replicate to Figure 5.

**Supplementary Figure S2.** Statistics of phosphopeptides and phosphoproteins identified in three biological replicates. A. quantitative phosphopeptides identified in three biological replicates. B. phosphoproteins identified in three biological replicates.

### **Supplemental Tables:**

**Supplemental Table S1.** LC-MS-MS based shotgun proteomic analysis for Wengfeng07.

**Supplemental Table S2.** LC-MS-MS based shotgun proteomic analysis for Union85140.

**Supplemental Table S3.** Primer list for Real-time PCR.

**Supplemental Table S4.** Summary of quantitative phosphopeptides.

**Supplemental Table S5.** Summary of phosphoproteins with quantitative phosphopeptides.

**Supplemental raw data (MultiConsensus).** The annotated, mass labeled spectra for all modified peptides.

FIG. S1

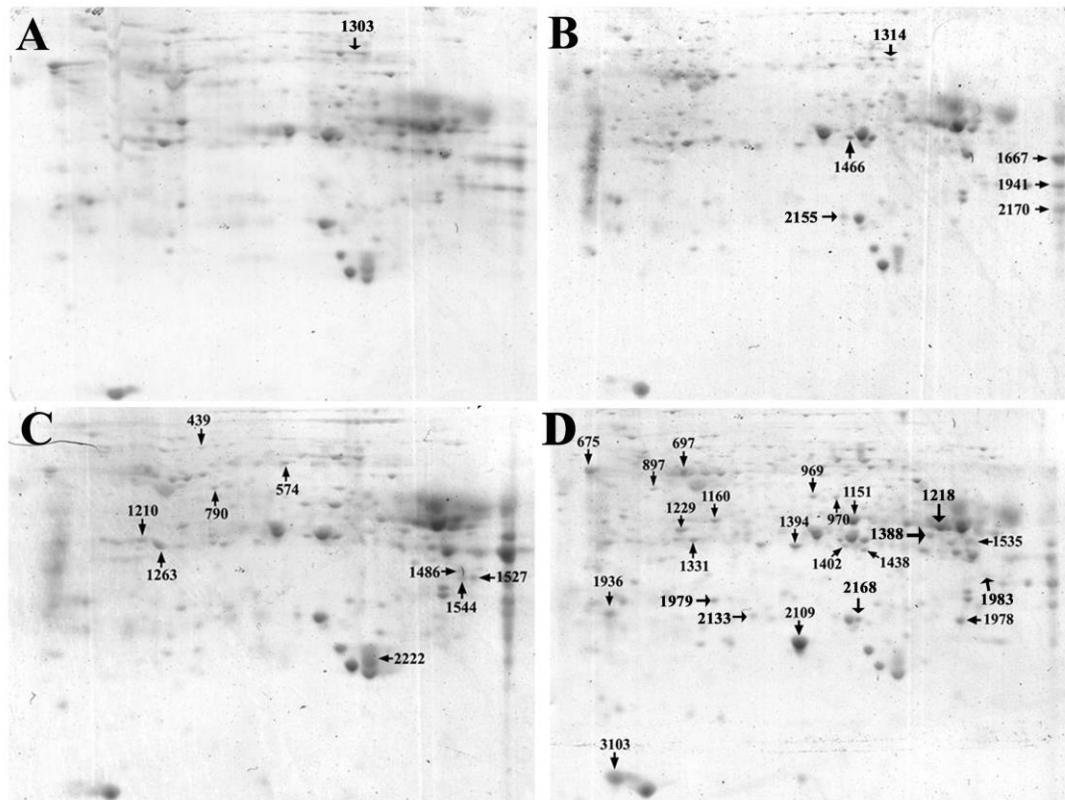

FIG. S2

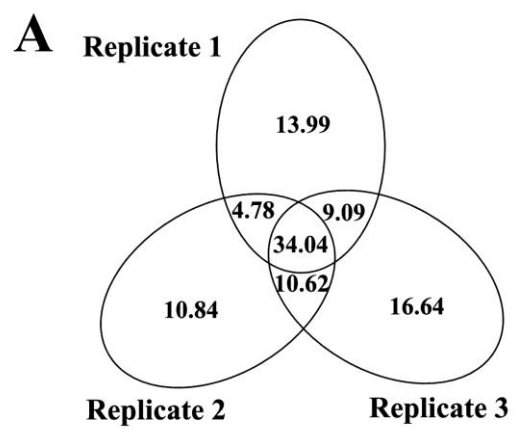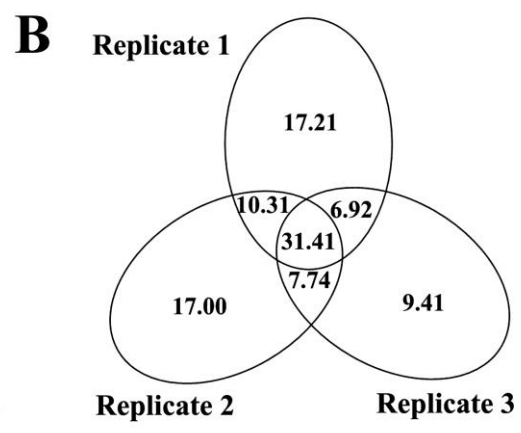

Supplement: 10.1074_M115.051961_mcp.M115.051961-1.pdf [file 10.1074_M115.051961_mcp.M115.051961-1.pdf]
